# Supplementary material for: Rapid and Effective Electrical Conductivity Improvement of the Ag NW-Based Conductor by Using the Laser-Induced Nano-Welding Process
Source: Micromachines (Basel). 2017 May 19;8(5):164. doi: 10.3390/mi8050164 (PMC6190447; doi:10.3390/mi8050164)
Supplement: Supplementary file 1 [file micromachines-08-00164-s001.pdf]

# Supplementary Materials: Rapid and Effective Electrical Conductivity Improvement of the Ag NW-Based Conductor by Using the Laser-Induced Nano-Welding Process

Phillip Lee, Jinhyeong Kwon, Jinhwan Lee, Habeom Lee, Young D. Suh, Sukjoon Hong and Junyeob Yeo

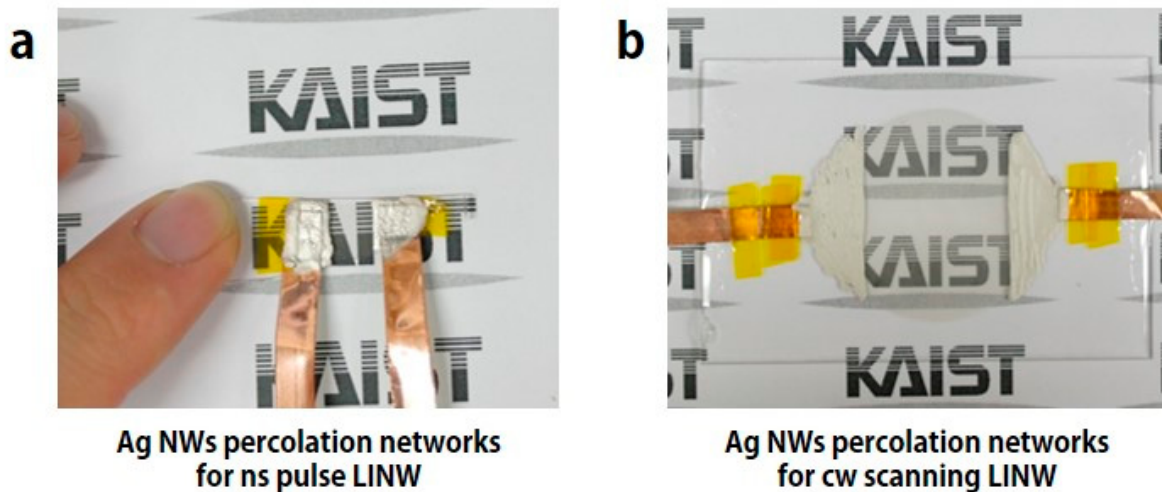

**Figure S1.** The sample preparation of Ag NWs percolation networks for the ns pulse (a) and cw scanning (b) LINW process. The transmittance of the sample is ~91 %.

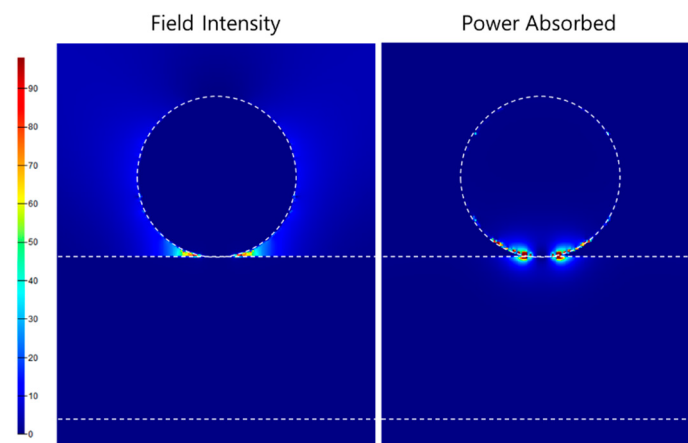

**Figure S2.** Spatial profile of electrical field intensity and the corresponding optical power absorption.
